# Supplementary material for: An Impact Assessment of Par-Baking and Storage on the Quality of Wheat, Whole Wheat, and Whole Rye Breads
Source: MDPI journal article supplement (doi:10.3390/foods13020224), 2024-01-10
Supplement: s1 [file s1]

## Supplementary Materials

**Table S1.** Pasting parameters [initial viscosity (IV), pasting temperature (PaT), peak viscosity (PeV), peak temperature (PeT), holding strength (HS), breakdown (BD), final viscosity (FV), setback from peak (SBp), and total setback (SBt)] of wheat flour (WF), whole wheat meal (WWM), whole rye meal (WRM) ( $n = 6$ ), and 50:50 blends of WWM:WF and WRM:WF ( $n = 3$ ).

| Pasting Parameter | WF                 | WWM:WF             | WWM                  | WRM:WF              | WRM                 |
|-------------------|--------------------|--------------------|----------------------|---------------------|---------------------|
| IV (mPa·s)        | $2.8 \pm 0.0^a$    | $5.6 \pm 2.2^{ab}$ | $30.4 \pm 15.9^{ab}$ | $21.5 \pm 16.8^b$   | $67.0 \pm 26.0^b$   |
| PaT (°C)          | $57.6 \pm 0.8^a$   | $59.3 \pm 0.1^a$   | $73.1 \pm 6.7^b$     | $59.7 \pm 2.2^{ab}$ | $60.4 \pm 3.4^{ab}$ |
| PeV (mPa·s)       | $2524 \pm 26^a$    | $1833 \pm 84^{ab}$ | $1231 \pm 74^b$      | $1991 \pm 66^{ab}$  | $1541 \pm 86^b$     |
| PeT (°C)          | $92.0 \pm 0.1^a$   | $92.0 \pm 0.2^a$   | $92.2 \pm 0.4^a$     | $91.5 \pm 0.3^a$    | $91.9 \pm 0.3^a$    |
| HS (mPa·s)        | $877 \pm 5^{ab}$   | $884 \pm 45^{ab}$  | $833 \pm 47^b$       | $997 \pm 51^a$      | $1203 \pm 95^a$     |
| BD (mPa·s)        | $1647 \pm 25^a$    | $950 \pm 50^{ab}$  | $398 \pm 58^b$       | $994 \pm 37^{ab}$   | $338 \pm 28^b$      |
| FV (mPa·s)        | $2232 \pm 32^{ab}$ | $2122 \pm 109^a$   | $1893 \pm 94^a$      | $2314 \pm 70^{ab}$  | $2782 \pm 135^b$    |
| SBp (mPa·s)       | $-291 \pm 9^a$     | $288 \pm 56^{ab}$  | $662 \pm 30^a$       | $323 \pm 40^{ab}$   | $1241 \pm 90^a$     |
| SBt (mPa·s)       | $1356 \pm 32^{ab}$ | $1238 \pm 67^{ab}$ | $1060 \pm 31^a$      | $1317 \pm 39^{ab}$  | $1579 \pm 63^b$     |

a-b: Values in the same row followed by different superscripts are significantly different ( $p < 0.05$ ).

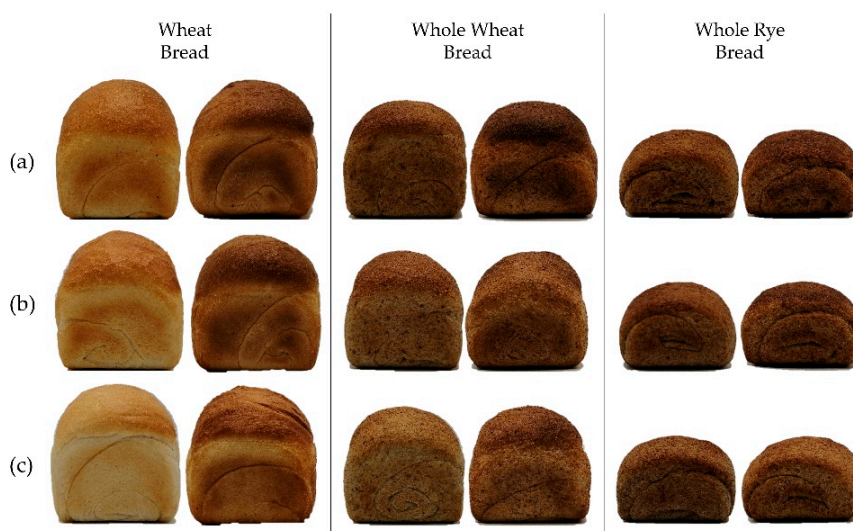

Figure S1: Par-baked (left) and full-baked (right) wheat, whole wheat, and whole rye breads previously par-baked at a) 95, b) 75 and c) 50% of the normal baking time.

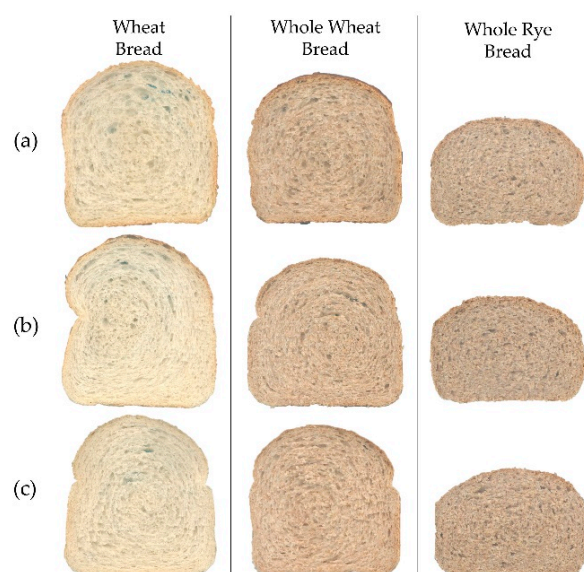

Figure S2: Bread slices of fully baked wheat, whole wheat, and whole rye breads previously par-baked at a) 95, b) 75 and c) 50% of the normal baking time.

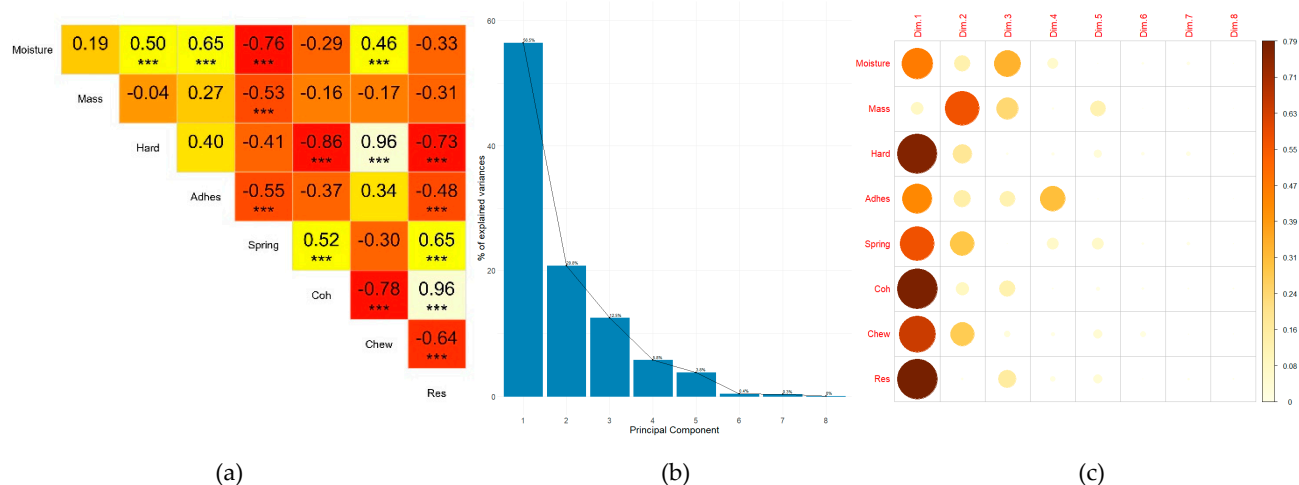

Figure S3: Correlation plot (a), scree plot (b) and visual representation of the importance of the individual factors in the dimensions of the PCA plot (c) – data of all bread types combined (W, WW and WR).

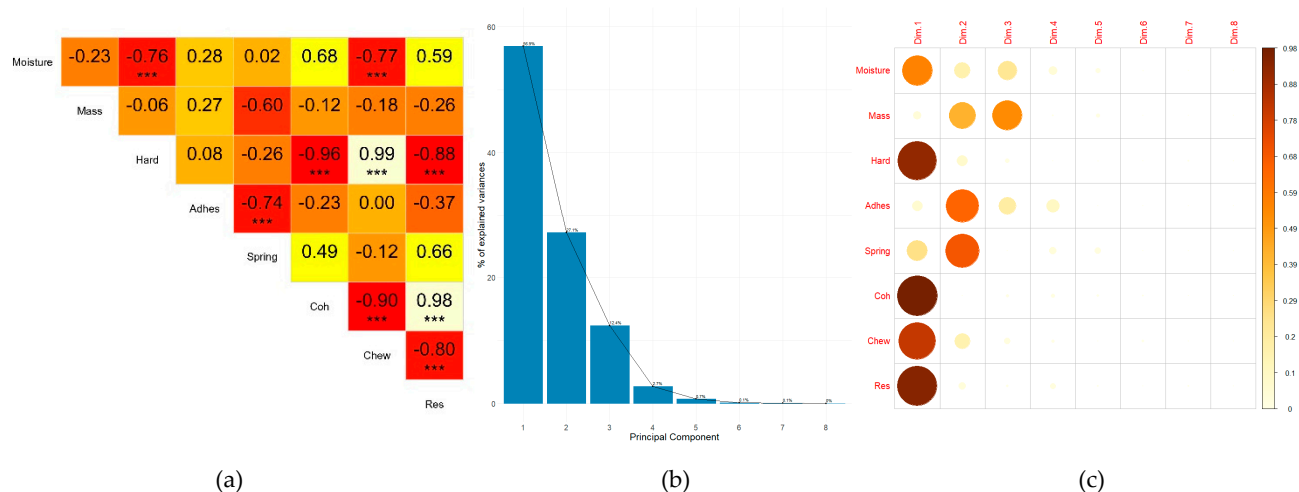

Figure S4: Correlation plot (a), scree plot (b) and visual representation of the importance of the individual factors in the dimensions of the PCA plot (c) – data of wheat bread.

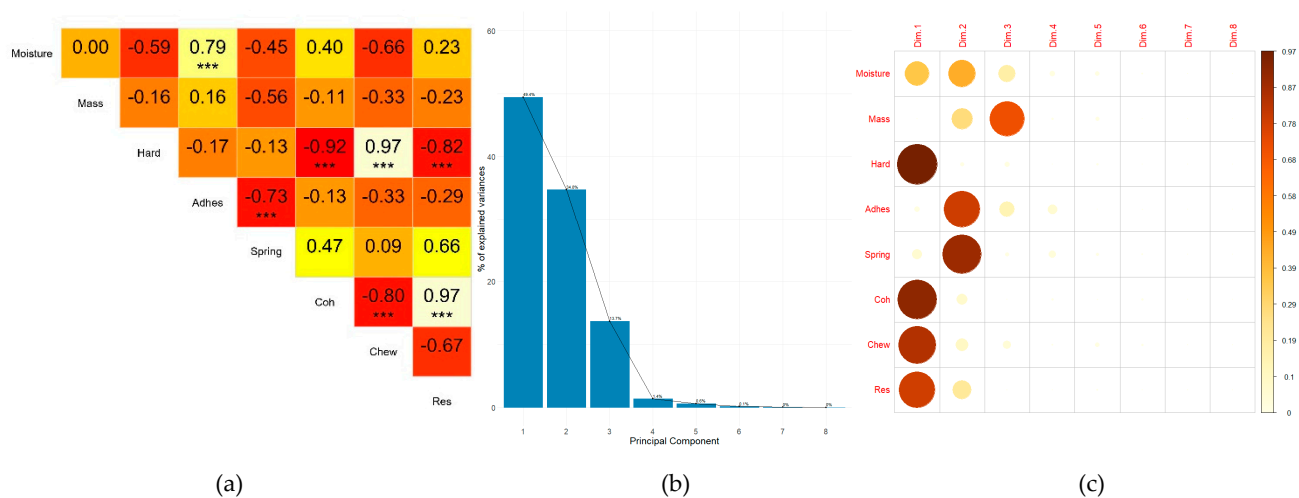

Figure S5: Correlation plot (a), scree plot (b) and visual representation of the importance of the individual factors in the dimensions of the PCA plot (c) – data of whole wheat bread.

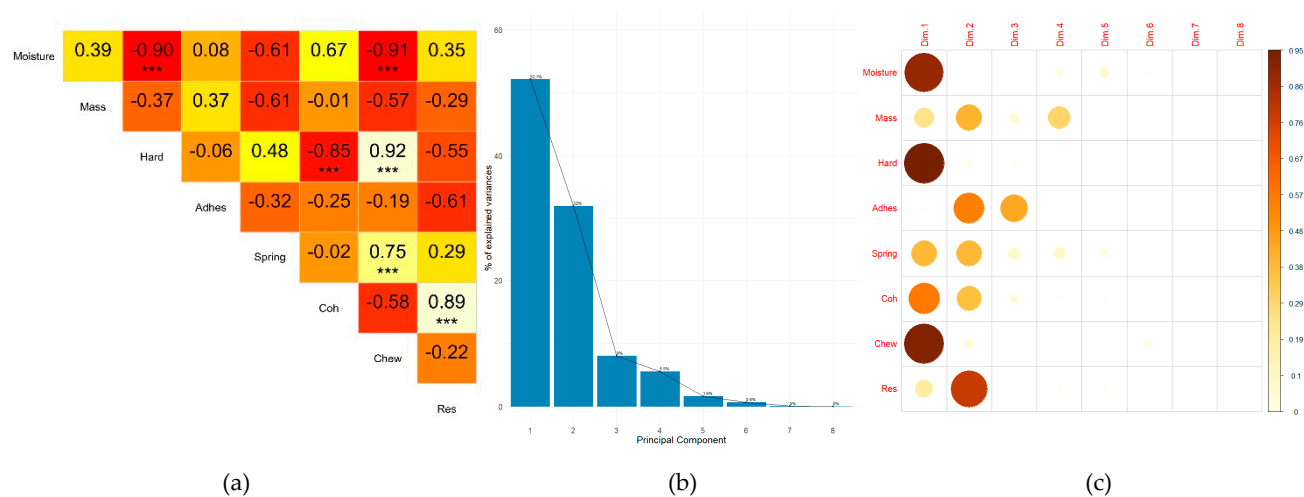

Figure S6: Correlation plot (a), scree plot (b) and visual representation of the importance of the individual factors in the dimensions of the PCA plot (c) – data of whole rye bread.
